# Supplementary material
Source: PubMed Central journal article supplement (PMC3633657)

**Supplemental Table 1.** Liver:body weight ratios\*

|                                   | Tsc1                 |               |               |               | Pten                 |               |                      |                | Tsc1;Pten            |                |
|-----------------------------------|----------------------|---------------|---------------|---------------|----------------------|---------------|----------------------|----------------|----------------------|----------------|
| Age (weeks)                       | 12                   |               | 60            |               | 12                   |               | 45                   |                | 10                   |                |
| Genotype                          | +/+                  | -/-           | +/+           | -/-           | +/+                  | -/-           | +/+                  | -/-            | +/+                  | -/-            |
| Male                              | 3.82<br>±0.12        | 4.33<br>±0.16 | 3.37<br>±0.11 | 5.65<br>±0.6  | 3.68<br>±0.11        | 7.39<br>±0.62 | 3.71<br>±0.22        | 14.63<br>±0.92 | 3.97<br>±0.14        | 12.64<br>±0.95 |
| p-value (+/+ vs. -/-)             | 0.02                 |               | 0.01          |               | 0.001                |               | 2 x 10 <sup>-6</sup> |                | 0.0008               |                |
| p-value                           | 9 x 10 <sup>-6</sup> |               |               |               | 0.003                |               |                      |                | 2 x 10 <sup>-7</sup> |                |
| Female                            | 3.6<br>±0.14         | 3.75<br>±0.14 | 3.13<br>±0.05 | 3.83<br>±0.22 | 3.56<br>±0.08        | 6.48<br>±0.24 | 3.35<br>±0.14        | 10.99<br>±0.7  | 4.07<br>±0.18        | 8.61<br>±0.54  |
| p-value (+/+ vs. -/-)             | 0.5                  |               | 0.007         |               | .000003              |               | 3 x 10 <sup>-6</sup> |                | 0.001                |                |
| p-value                           | N.S.                 |               |               |               | 2 x 10 <sup>-5</sup> |               |                      |                | 5 x 10 <sup>-7</sup> |                |
| p-value (male -/- vs. female -/-) | 0.02                 |               | 0.003         |               | 0.15                 |               | 0.005                |                | 0.02                 |                |

\*ratio expressed as percentage.

## Supplemental Figure 1

PCR genotyping illustrating the detection of *Cre*, *Tsc1<sup>fl</sup>* and *Pten<sup>fl</sup>* alleles in offsprings. The DKO mice carry the *Tsc1<sup>fl</sup>*, *Pten<sup>fl</sup>* and *Cre* alleles, whereas the Cre-negative controls contain the *Tsc1<sup>fl</sup>* and *Pten<sup>fl</sup>*, but not the *Cre*, alleles.

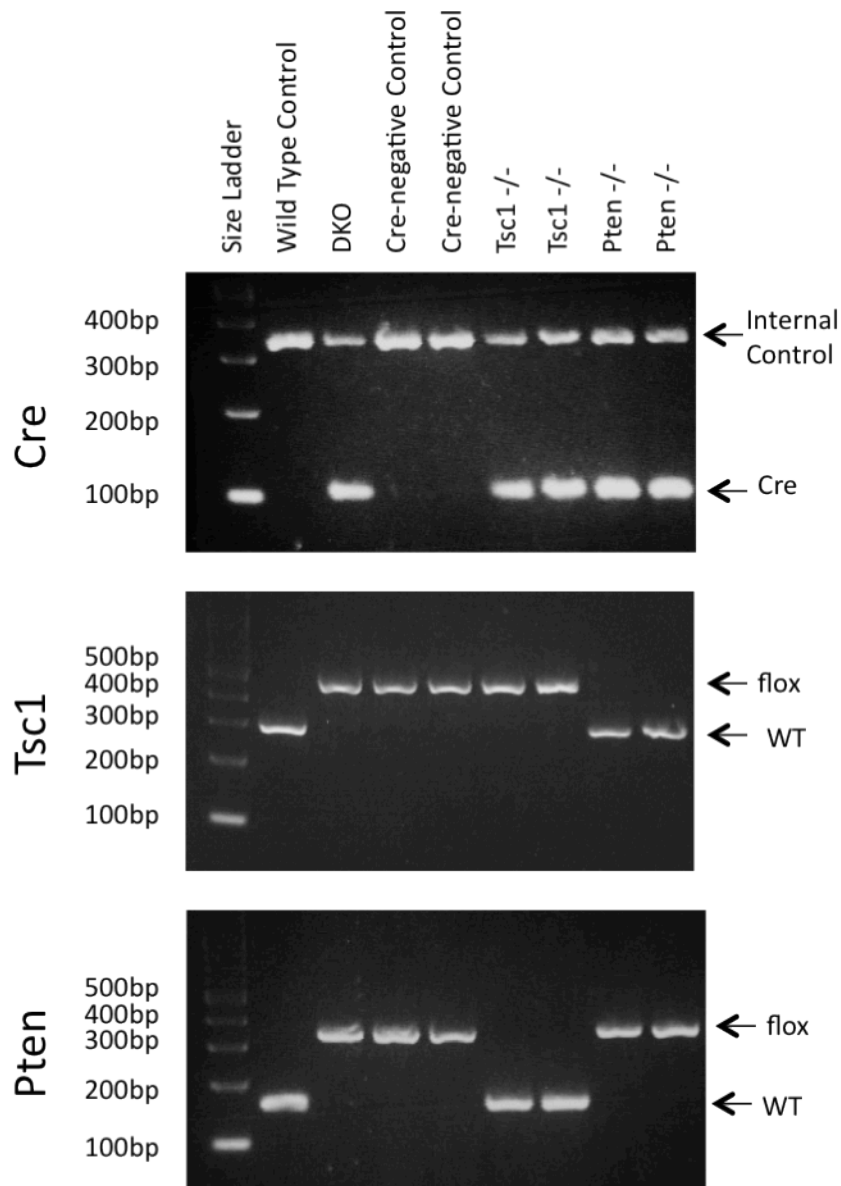

## Supplemental Figure 2

- A.** Biochemical profile of DKO primary cells (passage 4). Immunoblot analysis of cell lysates using indicated antibodies.

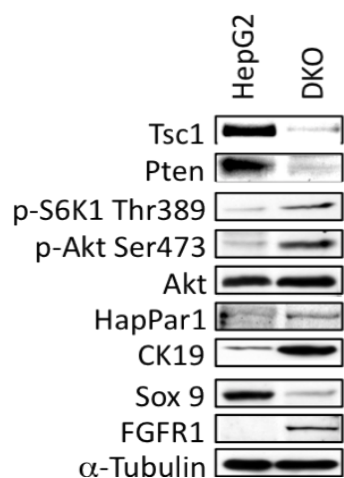

- B.** Effects of rapamycin and MK2206 on HepG2 cells. MTT assay was performed after 3 days of treatment with rapamycin (50nM) and/or MK2206 (500nM). \*  $p < 0.01$  compared to all other groups.

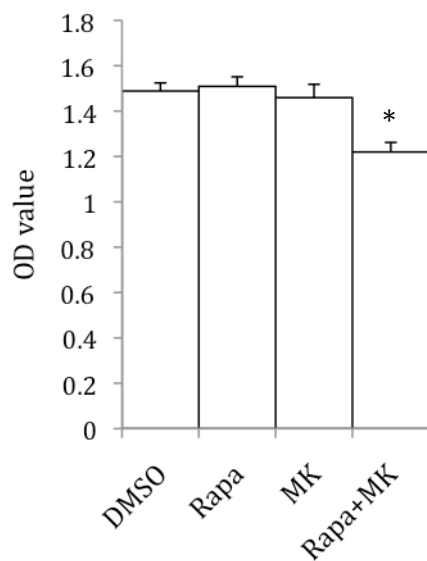

### Supplemental Figure 3

Activation of Akt in *Tsc1*<sup>-/-</sup> tumors. A) Expression of phospho-PRAS40(Thr246) by Western blot analysis of liver and tumor lysates from *Pten*<sup>-/-</sup> and *Tsc1*<sup>-/-</sup> mice along with their respective control (C) livers. *Pten*-null livers (-/-) and tumors (T) serve as positive controls for Akt activity. Comparatively, Akt activity in the *Tsc1*<sup>-/-</sup> tumors (T) was less than the *Pten* counterparts but higher than the *Tsc1*<sup>-/-</sup> livers (-/-). B) Additional examples of *Tsc1*<sup>-/-</sup> tumors (T) paired with adjacent non-tumor livers (N) highlighting the consistent increase in tumor phosphorylation of PRAS40(Thr246). C, control mouse livers. Actin serves as loading control.

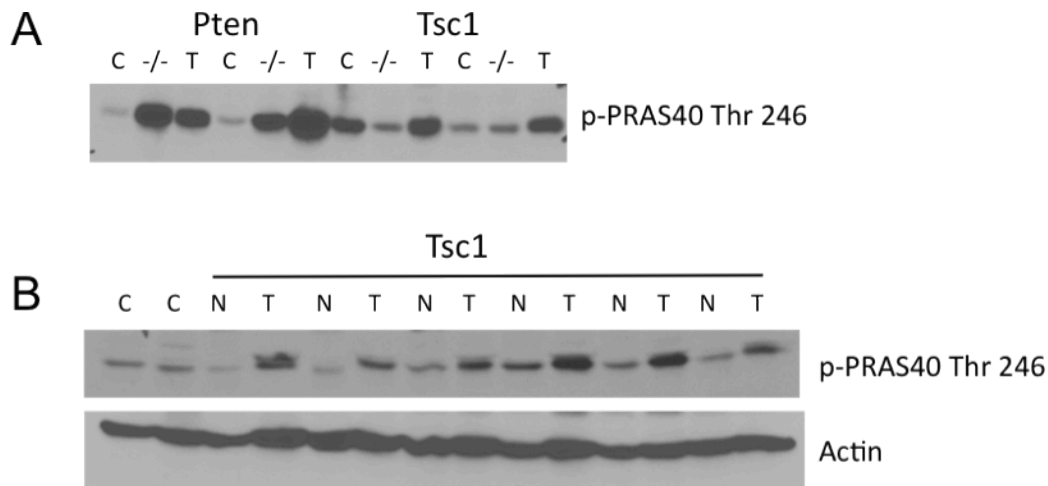

#### Supplemental Figure 4

Immunohistochemical analyses of Pten expression in liver tissues. Formalin-fixed paraffin-embedded tissue sections were processed for Pten immunostaining in non-tumor liver tissues from *Pten<sup>fl/fl</sup>* (Cre-negative), *Pten<sup>fl/fl</sup>;Alb-Cre* (*Pten*<sup>-/-</sup>) and *Tsc1<sup>fl/fl</sup>;Alb-Cre* (*Tsc1*<sup>-/-</sup>) mice. While most cells in the Cre-negative and *Tsc1*<sup>-/-</sup> livers expressed Pten, only the non-parenchymal cells in the *Pten*<sup>-/-</sup> stained positively with Pten antibody. (Note that some biliary epithelia express Pten in the *Pten*<sup>-/-</sup> livers – see Figure 4A)

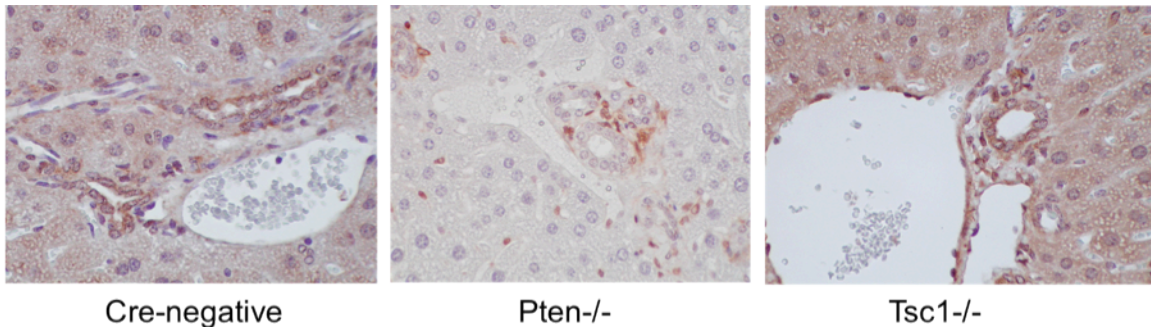

Supplement: NIHMS441891-supplement-01.pdf [file NIHMS441891-supplement-01.pdf]
